# Supplementary material for: Spatial Variability of PAHs and Microbial Community Structure in Surrounding Surficial Soil of Coal-Fired Power Plants in Xuzhou, China
Source: Int J Environ Res Public Health. 2016 Sep 2;13(9):878. doi: 10.3390/ijerph13090878 (PMC5036711; doi:10.3390/ijerph13090878)
Supplement: Supplementary file 1 [file ijerph-13-00878-s001.xlsx]

## Sheet: data
	latitude	east longitude	pH	EC
px-1	34.8181	116.886	8.1	435
px-2	34.8201	116.89	7.83	541
px-3	34.8222	116.892	7.59	517
px-4	34.824	116.89	7.39	650
px-5	34.8229	116.89	7.24	934
px-6	34.8209	116.89	7.61	104.1
px-7	34.8216	116.89	7.45	97.9
hr-1	34.3756	117.171	7.27	537
hr-2	34.3755	117.17	6.7	487
hr-3	34.3787	117.18	7.03	150.1
dt-1	34.3668	117.94	7.22	973
dt-2	34.3614	117.955	7.22	1053
dt-3	34.3622	117.945	7.3	783
hm-1	34.3329	117.103	7.72	115.9
hm-2	34.342	117.1	7.86	153.8
hm-3	34.3422	117.139	7.31	321
yz-1	34.412	117.399	7.51	114.9
yz-2	34.411	117.396	7.24	123.3
yz-3	34.3781	117.396	7.35	114.8
qt-1	34.3763	117.328	7.55	639
qt-2	34.3765	117.327	7.59	295
qt-3	34.3777	117.327	7.61	107.4
qt-4	34.3666	117.317	7.4	124.9

## Sheet: genus data
		px1	px2	hr1	hr2	dt1	dt2	hm1	hm2	yz1	yz2	qt1	qt2
	Bacteria;Proteobacteria;Alphaproteobacteria;Caulobacterales;Caulobacteraceae;Brevundimonas	0	0	0	0	0	0	0.001	0.001	0.001	0	0	0
	Bacteria;Proteobacteria;Alphaproteobacteria;Caulobacterales;Caulobacteraceae;Caulobacter	0	0	0	0	0	0	0	0	0	0	0	0
	Bacteria;Proteobacteria;Alphaproteobacteria;Caulobacterales;Caulobacteraceae;Other	0	0	0	0	0	0	0.001	0	0	0	0	0
	Bacteria;Proteobacteria;Alphaproteobacteria;Caulobacterales;Caulobacteraceae;Phenylobacterium	0.001	0.001	0.001	0.001	0.001	0.001	0.003	0.002	0.002	0.001	0.001	0.001
	Bacteria;Proteobacteria;Alphaproteobacteria;Caulobacterales;Other;Other	0	0	0	0	0	0	0	0	0	0	0	0
	Bacteria;Proteobacteria;Alphaproteobacteria;Other;Other;Other	0.008	0.007	0.007	0.008	0.011	0.012	0.008	0.008	0.008	0.009	0.012	0.01
	Bacteria;Proteobacteria;Alphaproteobacteria;Rhizobiales;Bradyrhizobiaceae;Bradyrhizobium	0.001	0.004	0.002	0.002	0.001	0	0.002	0.001	0.003	0.002	0.001	0.002
	Bacteria;Proteobacteria;Alphaproteobacteria;Rhizobiales;Bradyrhizobiaceae;Rhodopseudomonas	0	0	0	0	0	0	0	0	0.001	0.001	0	0
	Bacteria;Proteobacteria;Alphaproteobacteria;Rhizobiales;Hyphomicrobiaceae;Devosia	0.001	0	0	0.001	0	0	0	0.001	0.001	0.001	0	0
	Bacteria;Proteobacteria;Alphaproteobacteria;Rhizobiales;Hyphomicrobiaceae;Hyphomicrobium	0	0	0.001	0	0	0	0	0	0	0.001	0.001	0
	Bacteria;Proteobacteria;Alphaproteobacteria;Rhizobiales;Hyphomicrobiaceae;Other	0.002	0.002	0.003	0.001	0.001	0.001	0.001	0.002	0.001	0.002	0.002	0.001
	Bacteria;Proteobacteria;Alphaproteobacteria;Rhizobiales;Methylobacteriaceae;Methylobacterium	0	0	0	0	0	0	0.001	0	0	0	0	0
	Bacteria;Proteobacteria;Alphaproteobacteria;Rhizobiales;Methylobacteriaceae;Other	0	0	0	0	0.001	0	0.001	0.001	0.001	0	0	0.001
	Bacteria;Proteobacteria;Alphaproteobacteria;Rhizobiales;Methylocystaceae;Other	0	0	0	0	0	0	0	0	0	0	0	0
	Bacteria;Proteobacteria;Alphaproteobacteria;Rhizobiales;Other;Other	0.007	0.006	0.011	0.008	0.003	0.003	0.005	0.008	0.005	0.012	0.007	0.006
	Bacteria;Proteobacteria;Alphaproteobacteria;Rhizobiales;Phyllobacteriaceae;Mesorhizobium	0	0	0	0	0	0	0	0	0	0.001	0	0
	Bacteria;Proteobacteria;Alphaproteobacteria;Rhizobiales;Rhizobiaceae;Ensifer	0	0	0	0	0	0	0.001	0.002	0	0	0	0
	Bacteria;Proteobacteria;Alphaproteobacteria;Rhizobiales;Rhizobiaceae;Rhizobium	0	0	0	0	0	0	0.001	0.001	0	0	0	0
	Bacteria;Proteobacteria;Alphaproteobacteria;Rhodobacterales;Rhodobacteraceae;Other	0	0	0.001	0	0	0	0	0.001	0	0.001	0	0
	Bacteria;Proteobacteria;Alphaproteobacteria;Rhodospirillales;Acetobacteraceae;Other	0	0	0.001	0	0	0	0	0	0	0.001	0	0
	Bacteria;Proteobacteria;Alphaproteobacteria;Rhodospirillales;Acetobacteraceae;Roseomonas	0	0	0.002	0.001	0	0	0	0	0	0.001	0	0.001
	Bacteria;Proteobacteria;Alphaproteobacteria;Rhodospirillales;Acetobacteraceae;Stella	0	0	0	0	0	0	0	0	0	0	0	0.001
	Bacteria;Proteobacteria;Alphaproteobacteria;Rhodospirillales;Other;Other	0.012	0.014	0.011	0.016	0.008	0.006	0.007	0.006	0.011	0.01	0.012	0.019
	Bacteria;Proteobacteria;Alphaproteobacteria;Rhodospirillales;Rhodospirillaceae;Inquilinus	0	0	0	0	0	0	0	0	0	0	0	0
	Bacteria;Proteobacteria;Alphaproteobacteria;Rhodospirillales;Rhodospirillaceae;Magnetospirillum	0	0	0	0	0	0	0	0	0	0	0	0
	Bacteria;Proteobacteria;Alphaproteobacteria;Rhodospirillales;Rhodospirillaceae;Other	0.003	0.003	0.002	0.002	0.003	0.003	0.002	0.003	0.002	0.003	0.003	0.004
	Bacteria;Proteobacteria;Alphaproteobacteria;Rhodospirillales;Rhodospirillaceae;Pelagibius	0	0	0	0	0	0	0	0	0	0	0	0
	Bacteria;Proteobacteria;Alphaproteobacteria;Rhodospirillales;Rhodospirillaceae;Skermanella	0.001	0.001	0.001	0.001	0.002	0.002	0.003	0.006	0.001	0	0.002	0.002
	Bacteria;Proteobacteria;Alphaproteobacteria;Sphingomonadales;Erythrobacteraceae;Other	0	0	0	0	0	0	0	0	0	0	0	0
	Bacteria;Proteobacteria;Alphaproteobacteria;Sphingomonadales;Other;Other	0	0	0	0	0	0	0	0	0	0	0	0
	Bacteria;Proteobacteria;Alphaproteobacteria;Sphingomonadales;Sphingomonadaceae;Novosphingobium	0	0	0	0	0	0	0.001	0	0	0	0	0
	Bacteria;Proteobacteria;Alphaproteobacteria;Sphingomonadales;Sphingomonadaceae;Other	0	0	0.001	0.002	0	0	0.002	0.003	0.001	0.002	0	0
	Bacteria;Proteobacteria;Alphaproteobacteria;Sphingomonadales;Sphingomonadaceae;Sphingomonas	0	0.001	0.001	0.001	0	0	0.004	0.005	0.001	0.001	0	0.001
	Bacteria;Proteobacteria;Alphaproteobacteria;Sphingomonadales;Sphingomonadaceae;Sphingopyxis	0	0	0	0	0	0	0	0	0	0	0	0
	Bacteria;Proteobacteria;Alphaproteobacteria;Sphingomonadales;Sphingomonadaceae;Sphingosinicella	0	0	0	0	0	0	0	0	0	0	0	0
	Bacteria;Proteobacteria;Betaproteobacteria;Burkholderiales;Alcaligenaceae;Other	0	0	0	0	0	0	0	0	0	0	0	0
	Bacteria;Proteobacteria;Betaproteobacteria;Burkholderiales;Alcaligenaceae;Parasutterella	0	0	0	0	0	0	0	0	0	0	0	0
	Bacteria;Proteobacteria;Betaproteobacteria;Burkholderiales;Burkholderiaceae;Chitinimonas	0	0	0	0	0	0	0	0	0	0	0	0.008
	Bacteria;Proteobacteria;Betaproteobacteria;Burkholderiales;Burkholderiaceae;Cupriavidus	0	0	0	0	0	0	0	0	0	0	0	0
	Bacteria;Proteobacteria;Betaproteobacteria;Burkholderiales;Burkholderiaceae;Ralstonia	0	0	0	0	0	0	0	0	0	0	0	0
	Bacteria;Proteobacteria;Betaproteobacteria;Burkholderiales;Burkholderiales_incertae_sedis;Aquabacterium	0	0	0	0	0	0	0	0	0	0	0	0
	Bacteria;Proteobacteria;Betaproteobacteria;Burkholderiales;Burkholderiales_incertae_sedis;Inhella	0	0	0	0	0	0	0	0	0	0	0	0
	Bacteria;Proteobacteria;Betaproteobacteria;Burkholderiales;Burkholderiales_incertae_sedis;Methylibium	0	0.001	0.001	0.001	0	0	0	0.001	0.001	0.001	0	0.001
	Bacteria;Proteobacteria;Betaproteobacteria;Burkholderiales;Comamonadaceae;Comamonas	0	0	0	0	0	0	0	0	0	0	0	0
	Bacteria;Proteobacteria;Betaproteobacteria;Burkholderiales;Comamonadaceae;Hydrogenophaga	0	0	0	0	0	0	0	0.001	0	0	0	0
	Bacteria;Proteobacteria;Betaproteobacteria;Burkholderiales;Comamonadaceae;Other	0	0	0.001	0.001	0	0	0.001	0.002	0.001	0.001	0	0
	Bacteria;Proteobacteria;Betaproteobacteria;Burkholderiales;Comamonadaceae;Variovorax	0	0	0	0	0	0	0	0	0	0	0	0
	Bacteria;Proteobacteria;Betaproteobacteria;Burkholderiales;Other;Other	0	0.001	0.002	0.002	0.001	0	0.001	0.002	0.001	0.002	0.001	0.001
	Bacteria;Proteobacteria;Betaproteobacteria;Burkholderiales;Oxalobacteraceae;Duganella	0	0	0	0	0	0	0	0.001	0	0	0	0
	Bacteria;Proteobacteria;Betaproteobacteria;Burkholderiales;Oxalobacteraceae;Massilia	0	0	0	0	0	0	0.001	0.001	0	0	0	0
	Bacteria;Proteobacteria;Betaproteobacteria;Burkholderiales;Oxalobacteraceae;Other	0	0	0	0	0	0	0	0	0	0	0	0
	Bacteria;Proteobacteria;Betaproteobacteria;Hydrogenophilales;Hydrogenophilaceae;Thiobacillus	0	0.002	0.013	0.009	0	0	0	0	0.012	0.014	0.001	0
	Bacteria;Proteobacteria;Betaproteobacteria;Other;Other;Other	0.024	0.033	0.031	0.038	0.014	0.017	0.017	0.041	0.028	0.037	0.034	0.031
	Bacteria;Proteobacteria;Betaproteobacteria;Rhodocyclales;Rhodocyclaceae;Other	0	0.001	0.003	0.003	0	0	0	0	0.001	0.002	0	0.001
	Bacteria;Proteobacteria;Deltaproteobacteria;Bdellovibrionales;Bdellovibrionaceae;Bdellovibrio	0	0	0.001	0.001	0	0	0	0	0.001	0.001	0	0
	Bacteria;Proteobacteria;Deltaproteobacteria;Desulfobacterales;Desulfobacteraceae;Other	0	0.002	0.004	0.003	0	0	0	0	0.004	0.006	0.001	0.001
	Bacteria;Proteobacteria;Deltaproteobacteria;Desulfobacterales;Desulfobulbaceae;Desulfobulbus	0	0.003	0.014	0.01	0.001	0	0	0	0.004	0.006	0.001	0
	Bacteria;Proteobacteria;Deltaproteobacteria;Desulfobacterales;Desulfobulbaceae;Desulfocapsa	0	0.001	0.002	0.003	0	0	0	0	0.001	0.002	0	0
	Bacteria;Proteobacteria;Deltaproteobacteria;Desulfobacterales;Desulfobulbaceae;Other	0	0	0.001	0.001	0	0	0	0	0.002	0	0	0
	Bacteria;Proteobacteria;Deltaproteobacteria;Desulfobacterales;Other;Other	0	0.001	0.001	0.001	0	0	0	0	0	0.001	0	0
	Bacteria;Proteobacteria;Deltaproteobacteria;Desulfuromonadales;Desulfuromonadaceae;Other	0	0.001	0.002	0.002	0	0	0	0	0.001	0.001	0.001	0.001
	Bacteria;Proteobacteria;Deltaproteobacteria;Desulfuromonadales;Geobacteraceae;Geobacter	0	0.002	0.003	0.004	0	0	0	0	0.004	0.003	0.001	0.001
	Bacteria;Proteobacteria;Deltaproteobacteria;Desulfuromonadales;Other;Other	0	0.001	0.001	0.001	0	0	0	0	0.001	0	0	0
	Bacteria;Proteobacteria;Deltaproteobacteria;Myxococcales;Cystobacteraceae;Anaeromyxobacter	0	0.001	0.001	0.002	0	0	0	0	0.001	0.003	0	0
	Bacteria;Proteobacteria;Deltaproteobacteria;Myxococcales;Other;Other	0.002	0.003	0.004	0.003	0.002	0.005	0.002	0.003	0.003	0.005	0.004	0.003
	Bacteria;Proteobacteria;Deltaproteobacteria;Other;Other;Other	0.002	0.005	0.007	0.006	0.002	0.003	0.002	0.004	0.005	0.01	0.005	0.003
	Bacteria;Proteobacteria;Deltaproteobacteria;Syntrophobacterales;Syntrophaceae;Desulfobacca	0	0	0.001	0.001	0	0	0	0	0.001	0.001	0	0
	Bacteria;Proteobacteria;Deltaproteobacteria;Syntrophobacterales;Syntrophaceae;Other	0	0	0.001	0.001	0	0	0	0	0.001	0.001	0	0
	Bacteria;Proteobacteria;Deltaproteobacteria;Syntrophobacterales;Syntrophaceae;Smithella	0	0	0	0	0	0	0	0	0	0	0	0
	Bacteria;Proteobacteria;Deltaproteobacteria;Syntrophobacterales;Syntrophobacteraceae;Other	0.002	0.004	0.003	0.003	0	0	0	0	0.004	0.004	0.004	0.002
	Bacteria;Proteobacteria;Deltaproteobacteria;Syntrophobacterales;Syntrophobacteraceae;Syntrophobacter	0.001	0.001	0.001	0.002	0	0	0	0	0.002	0.002	0.003	0.001
	Bacteria;Proteobacteria;Epsilonproteobacteria;Campylobacterales;Helicobacteraceae;Sulfuricurvum	0	0.001	0.015	0.013	0.001	0	0	0	0.199	0.023	0.001	0
	Bacteria;Proteobacteria;Epsilonproteobacteria;Campylobacterales;Other;Other	0	0	0	0	0	0	0	0	0.002	0	0	0
	Bacteria;Proteobacteria;Gammaproteobacteria;Legionellales;Coxiellaceae;Aquicella	0.01	0.001	0.001	0.001	0.002	0.002	0.001	0	0	0.001	0.002	0.002
	Bacteria;Proteobacteria;Gammaproteobacteria;Other;Other;Other	0.01	0.012	0.022	0.023	0.011	0.008	0.003	0.012	0.012	0.016	0.012	0.008
	Bacteria;Proteobacteria;Gammaproteobacteria;Pasteurellales;Pasteurellaceae;Histophilus	0	0	0	0	0	0	0.001	0	0	0	0	0
	Bacteria;Proteobacteria;Gammaproteobacteria;Pseudomonadales;Pseudomonadaceae;Cellvibrio	0	0	0	0	0	0	0	0.001	0	0	0	0
	Bacteria;Proteobacteria;Gammaproteobacteria;Pseudomonadales;Pseudomonadaceae;Other	0.003	0.001	0.001	0.002	0	0.001	0.001	0.002	0.001	0.001	0.002	0.002
	Bacteria;Proteobacteria;Gammaproteobacteria;Pseudomonadales;Pseudomonadaceae;Pseudomonas	0.001	0	0	0	0.001	0.001	0.001	0.002	0	0	0.001	0.001
	Bacteria;Proteobacteria;Gammaproteobacteria;Xanthomonadales;Other;Other	0	0	0.001	0.001	0	0	0	0	0	0.001	0	0
	Bacteria;Proteobacteria;Gammaproteobacteria;Xanthomonadales;Sinobacteraceae;Steroidobacter	0	0	0	0	0	0	0.001	0.002	0	0	0	0
	Bacteria;Proteobacteria;Gammaproteobacteria;Xanthomonadales;Xanthomonadaceae;Lysobacter	0.001	0.001	0.001	0.001	0	0.001	0	0.002	0.001	0	0	0.001
	Bacteria;Proteobacteria;Gammaproteobacteria;Xanthomonadales;Xanthomonadaceae;Other	0	0.001	0.002	0.001	0	0.001	0	0.002	0.003	0.001	0.001	0.001
	Bacteria;Proteobacteria;Gammaproteobacteria;Xanthomonadales;Xanthomonadaceae;Pseudoxanthomonas	0	0	0	0	0	0	0	0.001	0	0	0	0
	Bacteria;Proteobacteria;Gammaproteobacteria;Xanthomonadales;Xanthomonadaceae;Stenotrophomonas	0	0	0	0	0	0	0	0.001	0	0	0	0
